# Supplementary material for: Structural basis for antibiotic action of the B1 antivitamin 2′-methoxy-thiamine
Source: Springer Nature journal article supplement (doi:10.1038/s41589-020-0628-4), 2020-08-24
Supplement: 41589_2020_628_MOESM1_ESM.pdf [file 41589_2020_628_MOESM1_ESM.pdf]

---

**Supplementary information**

---

**Structural basis for antibiotic action of the  
B<sub>1</sub> antivitamin 2'-methoxy-thiamine**

---

In the format provided by the  
authors and unedited

# Supplementary Information

## Structural basis for antibiotic action of the B1 antivitamin 2'-methoxy-thiamine

Fabian Rabe von Pappenheim<sup>1,2,\*</sup>, Matteo Aldeghi<sup>3,\*</sup>, Brateen Shome<sup>4</sup>, Tadhg Begley<sup>4</sup>, Bert L. de Groot<sup>3,✉</sup>, & Kai Tittmann<sup>1,2,✉</sup>

<sup>1</sup> Department of Molecular Enzymology, Göttingen Center of Molecular Biosciences, University of Göttingen, Julia-Lermontowa-Weg 3, 37077 Göttingen, Germany

<sup>2</sup> Department of Structural Dynamics, Max-Planck-Institute for Biophysical Chemistry, Am Fassberg 11, 37077 Göttingen, Germany

<sup>3</sup> Research Group of Computational Biomolecular Dynamics, Max-Planck-Institute for Biophysical Chemistry, Am Fassberg 11, 37077 Göttingen, Germany

<sup>4</sup> Department of Chemistry, Texas A&M University, College Station, Texas 77842, United States

\* Both authors contributed equally.

✉ To whom correspondence shall be addressed: [bgroot@gwdg.de](mailto:bgroot@gwdg.de) (B.d.G.), [ktittma@gwdg.de](mailto:ktittma@gwdg.de) (K.T.)

# Supplementary Tables

**Supplementary Table 1.** Kinetic and thermodynamic constants of *E. coli* transketolase reconstituted with either ThDP or MThDP.

|                              | Steady-state kinetic constants <sup>a</sup> |                            |                                                            | Cofactor activation <sup>b</sup>             | Cofactor binding <sup>c</sup>                                                      |                              |
|------------------------------|---------------------------------------------|----------------------------|------------------------------------------------------------|----------------------------------------------|------------------------------------------------------------------------------------|------------------------------|
|                              | $k_{cat}$ [s <sup>-1</sup> ]<br>X5P+R5P     | $K_m^{app}$ [mM]<br>X5P    | $k_{cat}/K_m^{app}$<br>[s <sup>-1</sup> mM <sup>-1</sup> ] | $k_{obs}$ [s <sup>-1</sup> ]<br>H/D-Exchange | $K_D$ cofactor [μM]<br>Fluorescence                                                | $K_m^{app}$ [μM]<br>Activity |
| <i>EcTK</i> <sub>ThDP</sub>  | 51.3 ± 0.4                                  | 0.34 ± 0.01                | 150.9                                                      | 313 ± 41                                     | 0.23 ± 0.01                                                                        | 2.0 ± 0.2                    |
| <i>EcTK</i> <sub>MThDP</sub> | 1.9 ± 0.1<br>(27-fold↘)                     | 0.36 ± 0.06<br>(no change) | 5.3<br>(28-fold↘)                                          | 2.9 ± 1.1<br>(108-fold↘)                     | 0.09 ± 0.02 <sup>d</sup><br>(2.5-fold↘)<br>13.39 ± 1.99 <sup>d</sup><br>(58-fold↗) | 21.9 ± 2.2<br>(11-fold↗)     |

<sup>a</sup> macroscopic steady-state kinetic constants  $k_{cat}$ ,  $K_m^{app}$  (X5P) and  $k_{cat}/K_m^{app}$  were determined using an enzymatic activity assay (conversion of donor X5P and acceptor R5P to products S7P and G3P)

<sup>b</sup>  $k_{obs}$  of H/D-exchange at C2 of enzyme-bound cofactor as a measure of cofactor activation was derived from rapid quench-flow/<sup>1</sup>H NMR spectroscopy

<sup>c</sup> equilibrium binding constants for ThDP and MThDP were estimated by both fluorescence quenching experiments as well as by steady-state enzymatic activity assay (see above) using different cofactor concentrations in the assay mixture

<sup>d</sup> two different binding regimes were observed in the fluorescence quenching experiments indicating a high-affinity binding (20% amplitude) and a major medium-affinity (80% amplitude) binding site or species

**Supplementary Table 2.** Data collection and refinement statistics.

|                                                     | <i>EcTK</i> MThDP<br>resting state #          | <i>EcTK</i> MThDP<br>Michaelis complex with X5P # |
|-----------------------------------------------------|-----------------------------------------------|---------------------------------------------------|
| <b>Data collection</b>                              |                                               |                                                   |
| Space group                                         | P2 <sub>1</sub> 2 <sub>1</sub> 2 <sub>1</sub> | P2 <sub>1</sub> 2 <sub>1</sub> 2 <sub>1</sub>     |
| Cell dimensions                                     |                                               |                                                   |
| <i>a</i> , <i>b</i> , <i>c</i> (Å)                  | 89.6 101.9 133.0                              | 89.8, 102.1, 133.1                                |
| $\alpha$ , $\beta$ , $\gamma$ (°)                   | 90, 90, 90                                    | 90, 90, 90                                        |
| Resolution (Å)                                      | 50 – 0.92 (0.95-0.92)*                        | 50 – 0.95 (1.03 – 0.95)*                          |
| <i>R</i> <sub>merge</sub>                           | 9.5 (61.4)                                    | 8.1 (88.6)                                        |
| <i>I</i> / $\sigma$ <i>I</i>                        | 9.73 (2.22)                                   | 12.46 (2.42)                                      |
| Completeness (%)                                    | 93.8 (61.6)                                   | 98.9 (96.6)                                       |
| Redundancy                                          | 4.2 (2.9)                                     | 6.1 (5.0)                                         |
| <b>Refinement</b>                                   |                                               |                                                   |
| Resolution (Å)                                      | 47.29 – 0.92                                  | 47.66 – 0.95                                      |
| No. reflections                                     | 780599                                        | 751409                                            |
| <i>R</i> <sub>work</sub> / <i>R</i> <sub>free</sub> | 9.48 / 10.64                                  | 9.86 / 11.02                                      |
| No. atoms                                           |                                               |                                                   |
| Protein                                             | 6290/6201                                     | 6187/6202                                         |
| Ligands (MThDP/X5P)                                 | 39/39                                         | 53/53                                             |
| Water                                               | 1638                                          | 1558                                              |
| Ligands (other)                                     | 180                                           | 146                                               |
| <i>B</i> -factors (Å <sup>2</sup> )                 |                                               |                                                   |
| Protein                                             | 9.1/8.8                                       | 9.1/9.0                                           |
| Ligands (MThDP/X5P)                                 | 8.9                                           | 9.2                                               |
| Water                                               | 23.0                                          | 23.3                                              |
| Ligands (other)                                     | 14.1                                          | 14.9                                              |
| R.m.s. deviations                                   |                                               |                                                   |
| Bond lengths (Å)                                    | 0.008                                         | 0.008                                             |
| Bond angles (°)                                     | 1.44                                          | 1.21                                              |

# Single crystal.

\*Values in parentheses are for highest-resolution shell.

**Supplementary Table 3.** Enzymatic activities and cofactor affinities of *E. coli* and human ThDP enzymes with genuine ThDP and antivitamin-derived MThDP (*E. coli* and human TK: this study; all other enzymes: reference 11). Note that strong inhibition with relative activities <10% (highlighted in red) is exclusively observed for *E. coli* enzymes, while human enzymes retain high enzymatic activities with MThDP.

|                               | Relative activity<br>with MThDP # | Binding constant<br>$K_D$ (ThDP) in $\mu\text{M}$ | Binding constant<br>$K_D$ (MThDP) in $\mu\text{M}$ |
|-------------------------------|-----------------------------------|---------------------------------------------------|----------------------------------------------------|
| <b><i>E. coli</i> enzymes</b> |                                   |                                                   |                                                    |
| TK                            | 3-4% <sup>a</sup>                 | 0.23 ± 0.01                                       | 0.09 ± 0.02<br>13.39 ± 1.99                        |
| PDHc E1                       | 6-11% <sup>a</sup>                | 7.0 ± 0.9                                         | 2.7 ± 0.6                                          |
| OGDHc E1                      | 74-80% <sup>b</sup>               | tight binding <sup>c</sup>                        | n.d. <sup>d</sup>                                  |
| DXPS                          | 9-14% <sup>a</sup>                | 3.5 ± 0.1                                         | 6.2 ± 0.2                                          |
| <b>Human enzymes</b>          |                                   |                                                   |                                                    |
| TK                            | 97% <sup>b</sup>                  | tight binding <sup>c</sup>                        | n.d. <sup>d</sup>                                  |
| PDHc E1                       | 50-75% <sup>a</sup>               | 7.2 ± 0.5                                         | 16.2 ± 4.5                                         |
| OGDHc E1                      | 89% <sup>b</sup>                  | tight binding <sup>c</sup>                        | n.d. <sup>d</sup>                                  |

Abbreviations: TK, transketolase; PDHc, pyruvate dehydrogenase complex; OGDHc, oxoglutarate dehydrogenase complex; DXPS, 1-deoxy-D-xylulose 5-phosphate synthase

# enzymatic activity after reconstitution with <sup>a</sup> or in presence of MThDP <sup>b</sup> relative to activity with genuine cofactor ThDP

<sup>a</sup> reconstituted with MThDP

<sup>b</sup> in presence of MThDP

<sup>c</sup> no true equilibrium binding constant can be estimated due to quasi-irreversible binding

<sup>d</sup> not determined

**Supplementary Table 4.** Predicted and experimental binding affinity differences ( $\Delta\Delta G$ , in kcal/mol) between ThDP and MThDP.

|                                                 | <i>EcTK</i>        | <i>HsTK</i>       | <i>EcPDH</i>       | <i>HsPDH</i>       |
|-------------------------------------------------|--------------------|-------------------|--------------------|--------------------|
| <b>Predicted <math>\Delta\Delta G</math></b>    | +3.10 $\pm$ 0.10   | +0.14 $\pm$ 0.15  | -0.08 $\pm$ 0.10   | -0.53 $\pm$ 0.29   |
| <b>Experimental <math>\Delta\Delta G</math></b> | +2.40 <sup>a</sup> | n.a. <sup>b</sup> | -0.82 <sup>a</sup> | +0.48 <sup>a</sup> |

<sup>a</sup> A positive  $\Delta\Delta G$  value indicates that MThDP has lower affinity than ThDP for the specified enzyme, while a negative  $\Delta\Delta G$  value indicates that MThDP has higher affinity. For predicted  $\Delta\Delta G$  values, the mean and its standard error are reported.

<sup>b</sup> The affinity of *HsTK* for MThDP is unknown.

**Supplementary Table 5.** Results of the binding free energy calculations used for validation.

| Force Field | Protein      | Transformation          | $\Delta\Delta G_{\text{exp}}$ | $\Delta\Delta G_{\text{calc}}$ | $\Delta\Delta G_{\text{calc}}$<br>(restrained) |
|-------------|--------------|-------------------------|-------------------------------|--------------------------------|------------------------------------------------|
| Amber       | <i>EcTK</i>  | ThDP → MThDP            | +2.40                         | +0.36 ± 0.21                   | +3.10 ± 0.10                                   |
| Amber       | <i>EcTK</i>  | ThDP → TP1 <sup>a</sup> | -0.05                         | +0.36 ± 0.13                   | +0.87 ± 0.12                                   |
| Amber       | <i>EcTK</i>  | ThDP → TP2 <sup>a</sup> | -1.08                         | -0.69 ± 0.14                   | -0.17 ± 0.14                                   |
| Amber       | <i>EcTK</i>  | WT → E411A <sup>a</sup> | -0.30                         | +0.09 ± 0.27                   | +0.23 ± 0.14                                   |
| Amber       | <i>EcPDH</i> | ThDP → MThDP            | -0.82                         | -0.18 ± 0.07                   | -0.08 ± 0.10                                   |
| Charmm      | <i>EcTK</i>  | ThDP → MThDP            | +2.40                         | -0.18 ± 0.15                   | +0.93 ± 0.05                                   |
| Charmm      | <i>EcTK</i>  | ThDP → TP1              | -0.05                         | +0.58 ± 0.12                   | +0.59 ± 0.06                                   |
| Charmm      | <i>EcTK</i>  | ThDP → TP2              | -1.08                         | +0.40 ± 0.11                   | +0.99 ± 0.10                                   |
| Charmm      | <i>EcTK</i>  | WT → E411A              | -0.30                         | +0.66 ± 0.32                   | +0.13 ± 0.09                                   |
| Charmm      | <i>EcPDH</i> | ThDP → MThDP            | -0.82                         | -0.36 ± 0.08                   | -0.57 ± 0.04                                   |

ThDP: *thiamine diphosphate*; MThDP: *2'-methoxythiamin diphosphate*; TP1: *4'-desamino ThDP*; TP2: *N3'-pyridyl ThDP*; WT: *wild-type*.

Scatter plots of these results are shown in Extended Data Fig. 6a-d. The Amber99sb\*-ILDN/GAFF(v2.1) force field is referred to as “Amber”, and the Charmm36/CGenFF(v3.0.1) force files is referred to as “Charmm”. All  $\Delta\Delta G$  values are in kcal/mol. For the calculated  $\Delta\Delta G$  values, the mean and standard error are reported.

<sup>a</sup> data taken from: Asztalos, P., *PhD thesis*, 2008, Martin-Luther University Halle-Wittenberg, Germany
